# Supplementary material
Source: ML conference proceedings conference paper supplement (https://openaccess.thecvf.com/content/WACV2022/html/Ke_Recursive_Contour-Saliency_Blending_WACV_2022_paper.html)
Supplement: Supplementary file 1 [file Ke_Recursive_Contour-Saliency_Blending_WACV_2022_supplemental.pdf]

# Recursive Contour-Saliency Blending Network for Accurate Salient Object Detection

## (Supplimentary Material)

Yun Yi Ke  
Computer Vision & AI Technology Lab  
Open8 Singapore  
yunyikeyyk@gmail.com

Takahiro Tsubono<sup>†</sup>  
Computer Vision & AI Technology Lab  
Open8 Singapore  
tsubonot@open8.com

### 1. Content

In this supplementary file, we provide more details of our proposed network, RCSBNet. Specifically,

- in Section 2, we present more details and analysis of our model.
- in Section 3, we present more comparisons of saliency predictions between RCSBNet and other state-of-the-art models.
- in Section 4, we provide more comparisons of contour predictions between RCSBNet and state-of-the-art models using contour information, which are ITSD [6] and PoolNet [2].

### 2. Experimental Results and Model Analysis

**Predictions of Intermediate Layers.** In the figure below, we illustrate how final predictions are generated stage by stage in our RCSBNet.

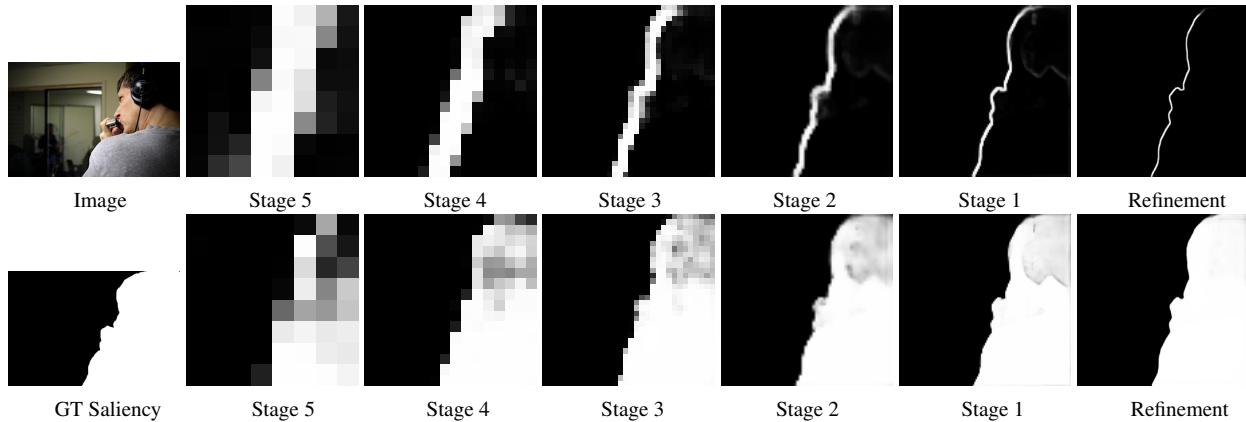

Figure 1: Visualizations of intermediate predictions from each decoder stage and refinement module. First row: input image and contour predictions from 5 decoder stages and refinement module. Second row: ground truth saliency and saliency predictions from 5 decoder stages and refinement module. Note that prediction accuracy is improved from stage 5 to stage 1 due to the training against accuracy-related loss. The confidence of prediction gets enhanced at the refinement stage due to the training against confidence loss.

---

<sup>†</sup>Corresponding author.

For 5 decoder stages and refinement module, the output shapes are 8×8, 16×16, 32×32, 64×64, 128×128, and 256×256, respectively. Predictions are supervised against accuracy-related loss in stages 1 to 5 and confidence loss in the refinement module. As shown in Fig. 1, saliency prediction in stage 5 contains false negatives but gets enhanced in stage 1. Meanwhile, the confidence of saliency prediction in stage 1 gets improved after the refinement module.

**Using Confidence Score as an Evaluation Metric.** As mentioned in Sec. 3.6 in the paper, we introduced a confidence score,  $W_c$ , for each pixel  $x_{i,j}$  in prediction:  $W_c = \beta * x_{i,j} * (1 - x_{i,j})$ , where  $\beta$  is empirically set to 2. The score will be 0 if the prediction is binary and reach the maximum value if  $x_{i,j} = 0.5$ . Thus this score can also be used as an evaluation metric to measure how close is the saliency prediction against the binary ground truth. We define the average confidence score,  $C_\beta$ , among all images in a dataset as:

$$C_\beta = \frac{1}{n \times p \times q} \sum_{k=1}^n \sum_{i=1}^p \sum_{j=1}^q \beta * x_{i,j} * (1 - x_{i,j}) \quad (1)$$

where  $n$  represents total images in the dataset and  $p, q$  stand for image dimension. Thus, in addition to the quantitative comparison listed in Section 4.4 Table 1 in the paper, we also compare our model under average confidence score  $C_{\beta=2}$  with 7 state-of-the-art methods in the table below.

Table 1: Quantitative comparisons between RCSBNet and other 6 methods on five benchmark datasets in terms of the  $C_{\beta=2}$ . **Red**, **Green**, and **Blue** indicate the best, second best and third best performance. Subscripts stand for year of the paper.

| Method                    | Contour Information | DUTS-TE                  | DUT-OMRON                | PASCAL-S                 | ECSSD                    | HKU-IS                   |
|---------------------------|---------------------|--------------------------|--------------------------|--------------------------|--------------------------|--------------------------|
|                           |                     | $C_{\beta=2} \downarrow$ |
| F3Net <sub>20</sub> [4]   | ✗                   | <b>.0123</b>             | <b>.0143</b>             | <b>.0146</b>             | <b>.0127</b>             | .0109                    |
| MINet <sub>20</sub> [3]   | ✗                   | <b>.0143</b>             | <b>.0160</b>             | <b>.0190</b>             | <b>.0150</b>             | .0139                    |
| GCPA <sub>20</sub> [1]    | ✗                   | .0196                    | .0196                    | .0220                    | .0211                    | .0203                    |
| EGNet <sub>20</sub> [5]   | ✓                   | .0191                    | .0206                    | .0217                    | .0199                    | <b>.0059</b>             |
| PoolNet <sub>20</sub> [2] | ✓                   | .0182                    | .0195                    | .0209                    | .0193                    | <b>.0057</b>             |
| ITSD <sub>20</sub> [6]    | ✓                   | .0166                    | .0199                    | .0196                    | .0166                    | .0154                    |
| Ours                      | ✓                   | <b>.0085</b>             | <b>.0102</b>             | <b>.0106</b>             | <b>.0086</b>             | <b>.0081</b>             |

**Effectiveness of the number of recursions.** To investigate the effectiveness of recursion  $R$ , we gradually increase the recursion from 1 to 4 and measure  $\overline{F}_\beta$ ,  $MAE$ ,  $E_\xi$ , and  $F_\beta^\omega \uparrow$  accordingly on DUTS-TE and ECSSD datasets. As shown in Table 2, when  $R$  equals 3, the model yields the best performance.

Table 2: Ablation study for the effect of recursion number. When  $R=3$ , the best results are obtained.

|     | DUTS-TE                       |                |                  |                           | ECSSD                         |                |                  |                           |
|-----|-------------------------------|----------------|------------------|---------------------------|-------------------------------|----------------|------------------|---------------------------|
|     | $\overline{F}_\beta \uparrow$ | $M \downarrow$ | $E_\xi \uparrow$ | $F_\beta^\omega \uparrow$ | $\overline{F}_\beta \uparrow$ | $M \downarrow$ | $E_\xi \uparrow$ | $F_\beta^\omega \uparrow$ |
| R=1 | .836                          | .037           | .899             | .821                      | .917                          | .038           | .917             | .901                      |
| R=2 | .844                          | .036           | .901             | .830                      | .925                          | .035           | .918             | .908                      |
| R=3 | <b>.855</b>                   | <b>.034</b>    | <b>.903</b>      | <b>.840</b>               | <b>.927</b>                   | <b>.033</b>    | <b>.923</b>      | <b>.916</b>               |
| R=4 | .850                          | .038           | .900             | .832                      | .922                          | .036           | .916             | .910                      |

### 3. More Visual Comparisons on Saliency Predictions

We list more images in Fig. 2 for visual comparisons on saliency predictions. It is well demonstrated that our proposed RCSBNet can consistently generate accurate and complete saliency predictions compared with other state-of-the-art models. Besides, our model can detect small salient objects while predictions from other methods contain either incomplete predictions or a considerable amount of false positives.

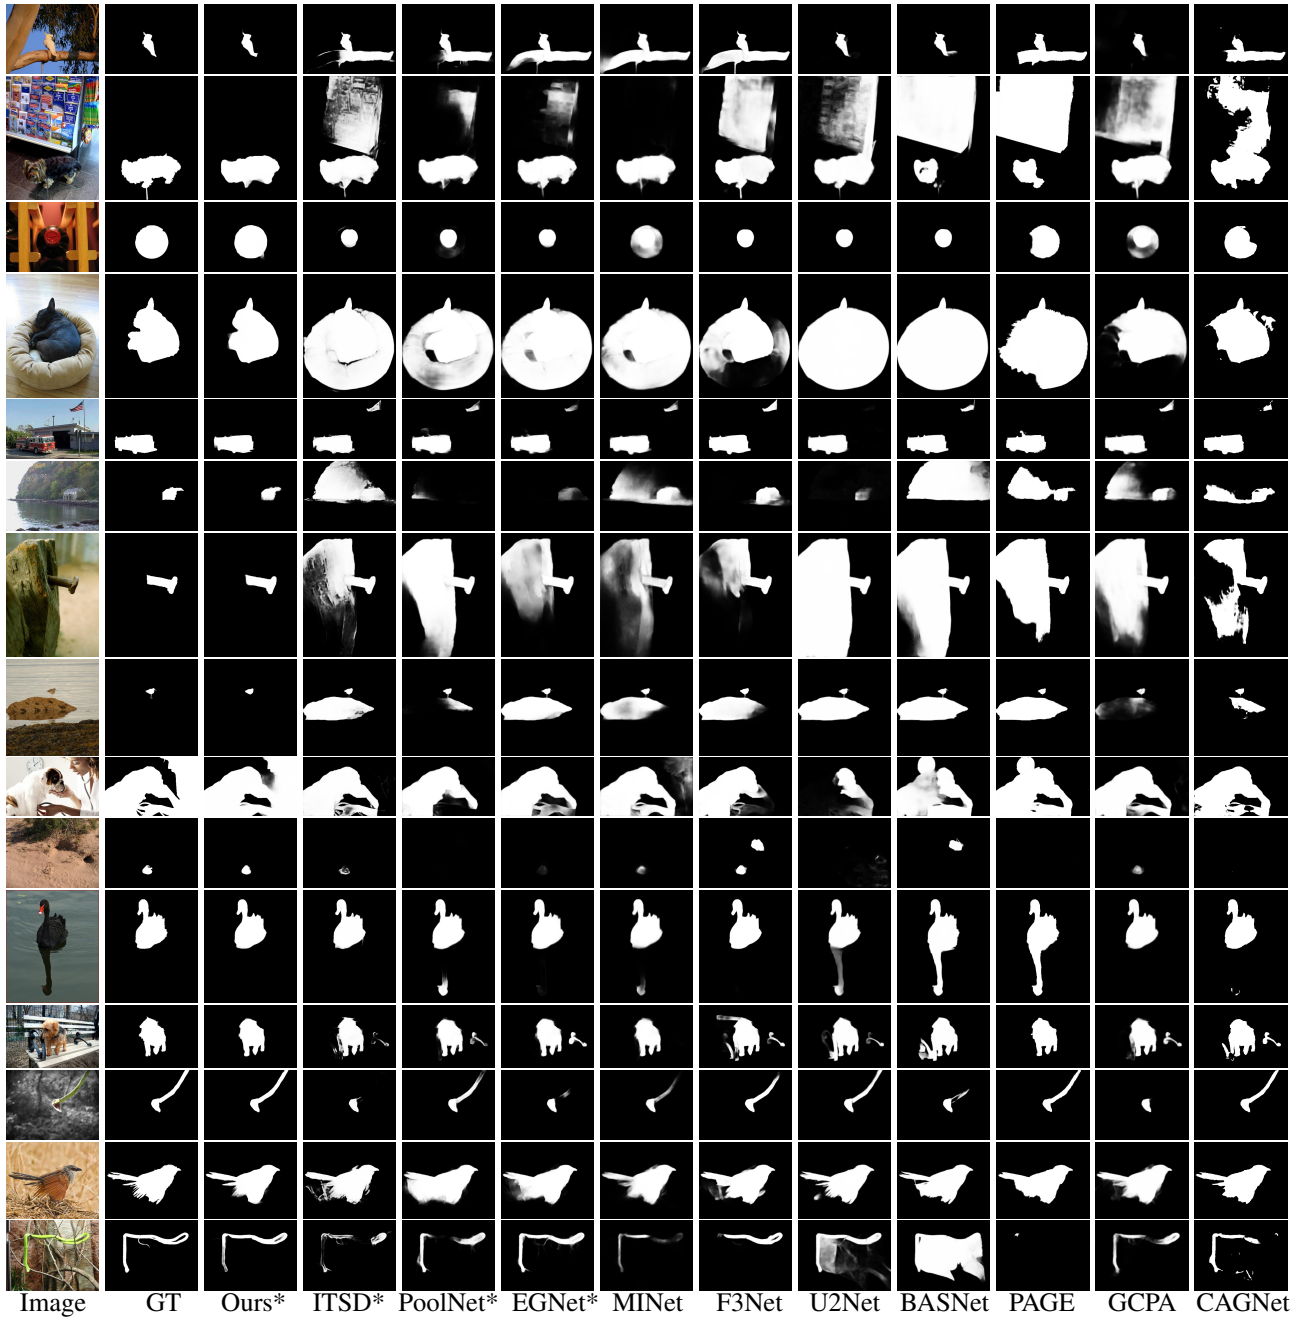

Figure 2: Visual comparison of salient object predictions between our method and 10 state-of-the-art networks. \* stands for models utilizing contour information.

#### 4. Visual Comparisons on Contour Predictions

We list more images in Fig. 3 for visual comparisons on contour predictions between our RCSBNet, ITSD, and PoolNet. As illustrated below, RCSB can generate more complete and better contour predictions. This is due to the stage-wise feature extraction (SFE) module and the effectiveness of the recursive mechanism where contour and saliency are blended multiple times.

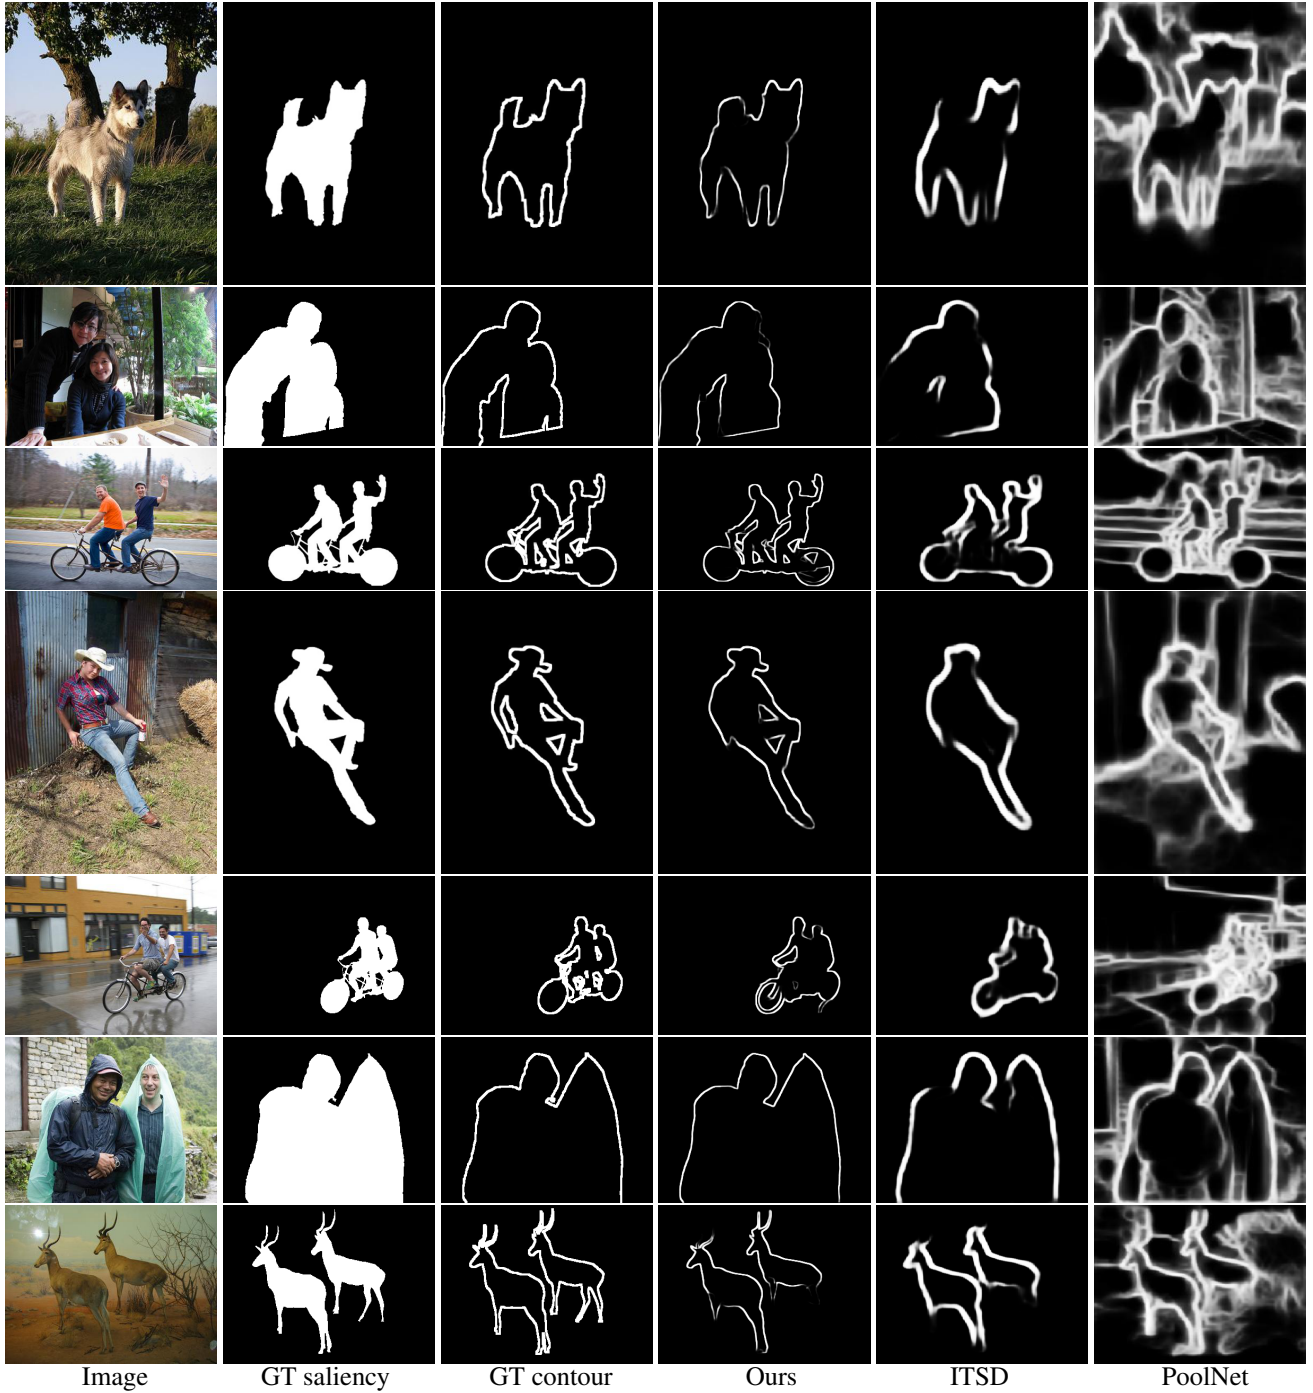

Figure 3: Visual comparison of contour predictions between our method, ITSD and PoolNet. Ground truth contours are obtained via erosion and dilation with kernel size of 5.

## References

- [1] Z. Chen, Q. Xu, R. Cong, and Q. Huang. Global context-aware progressive aggregation network for salient object detection. In *The Thirty-Fourth AAAI Conference on Artificial Intelligence, AAAI 2020, The Thirty-Second Innovative Applications of Artificial Intelligence Conference, IAAI 2020, The Tenth AAAI Symposium on Educational Advances in Artificial Intelligence, EAAI 2020, New York, NY, USA, February 7-12, 2020*, pages 10599–10606. AAAI Press, 2020.
- [2] J. Liu, Q. Hou, M. Cheng, J. Feng, and J. Jiang. A simple pooling-based design for real-time salient object detection. In *IEEE Conference on Computer Vision and Pattern Recognition, CVPR 2019, Long Beach, CA, USA, June 16-20, 2019*, pages 3917–3926. Computer Vision Foundation / IEEE, 2019.
- [3] Y. Pang, X. Zhao, L. Zhang, and H. Lu. Multi-scale interactive network for salient object detection. In *2020 IEEE/CVF Conference on Computer Vision and Pattern Recognition, CVPR 2020, Seattle, WA, USA, June 13-19, 2020*, pages 9410–9419. IEEE, 2020.
- [4] J. Wei, S. Wang, and Q. Huang. F3net: Fusion, feedback and focus for salient object detection. *CoRR*, abs/1911.11445, 2019.
- [5] J. Zhao, J. Liu, D. Fan, Y. Cao, J. Yang, and M. Cheng. Egnet: Edge guidance network for salient object detection. In *2019 IEEE/CVF International Conference on Computer Vision, ICCV 2019, Seoul, Korea (South), October 27 - November 2, 2019*, pages 8778–8787. IEEE, 2019.
- [6] H. Zhou, X. Xie, J. Lai, Z. Chen, and L. Yang. Interactive two-stream decoder for accurate and fast saliency detection. In *2020 IEEE/CVF Conference on Computer Vision and Pattern Recognition, CVPR 2020, Seattle, WA, USA, June 13-19, 2020*, pages 9138–9147. IEEE, 2020.
